# Supplementary material for: Ecohydrological responses to solar radiation changes
Source: Copernicus journal article supplement (doi:10.5194/egusphere-2024-768), 2024-03-26
Supplement: Supplementary file 1 [file egusphere-2024-768-supplement.zip]

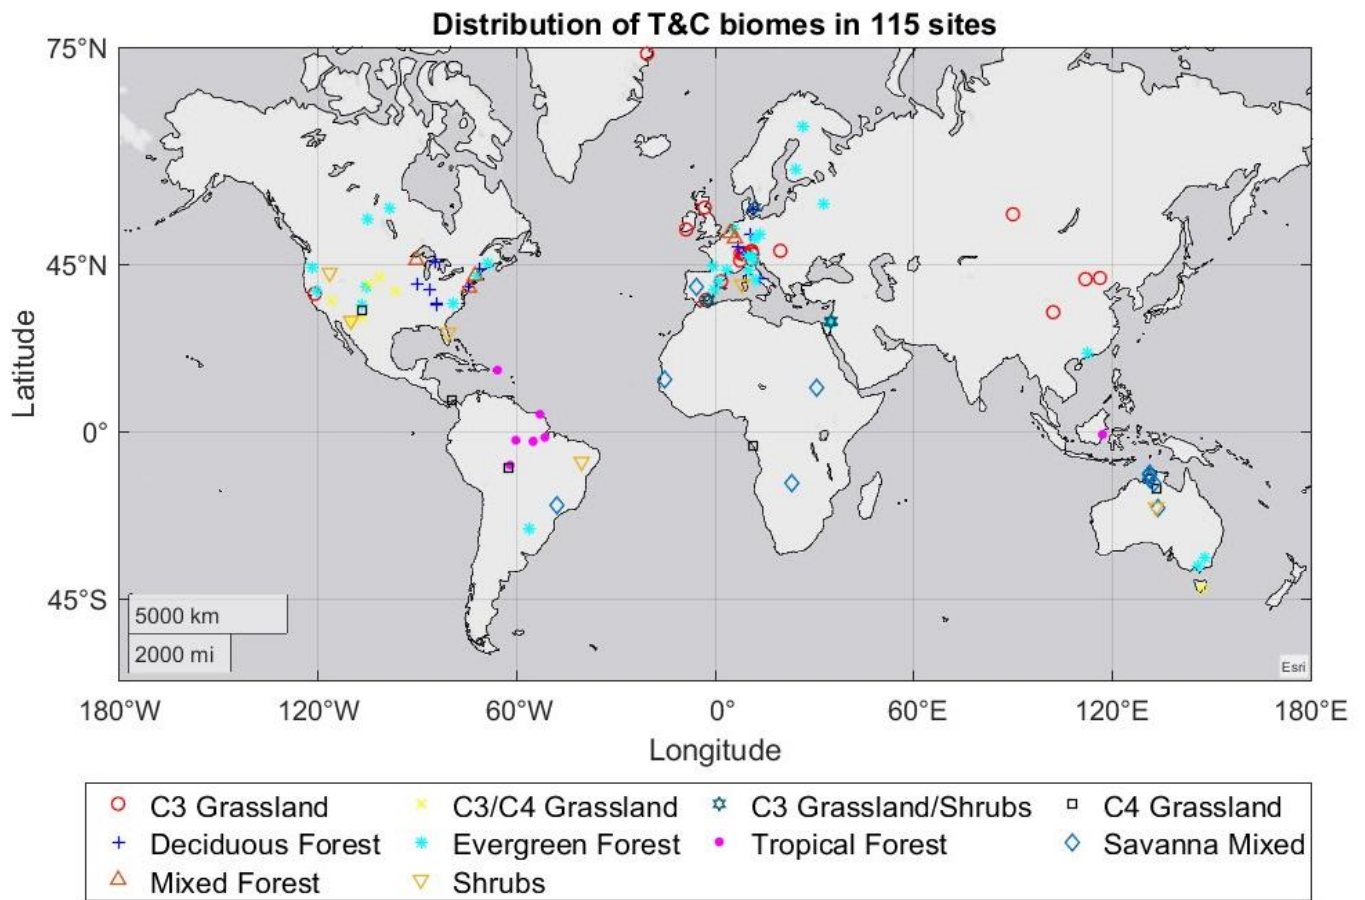

**Figure S1.** Geographical distribution of the 115 sites used for the ecohydrological T&C simulations and their associated biomes.

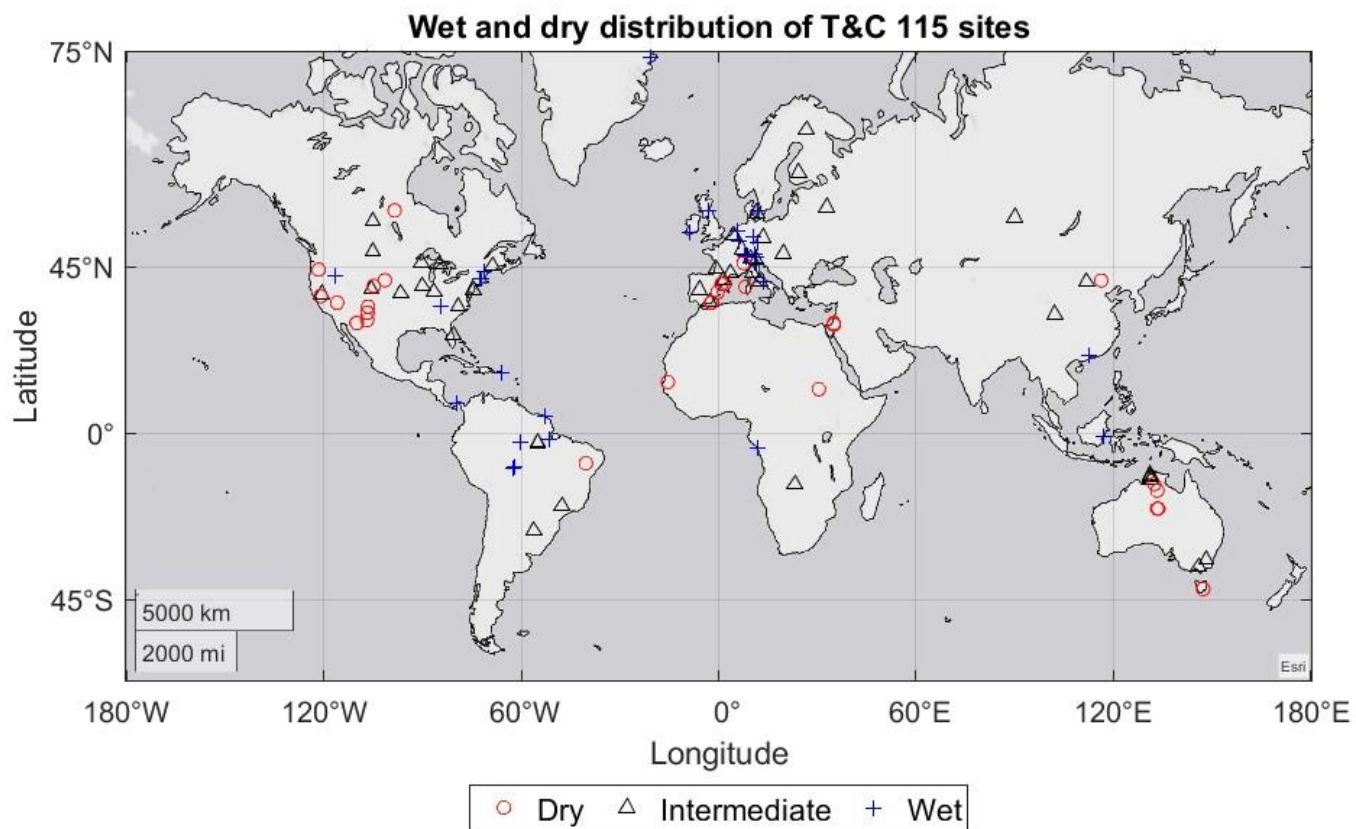

**Figure S2.** Geographical distribution of the 115 sites used for the ecohydrological T&C simulations and their associated Wetness Index (WI) distribution subdivided in wet, intermediate, dry.

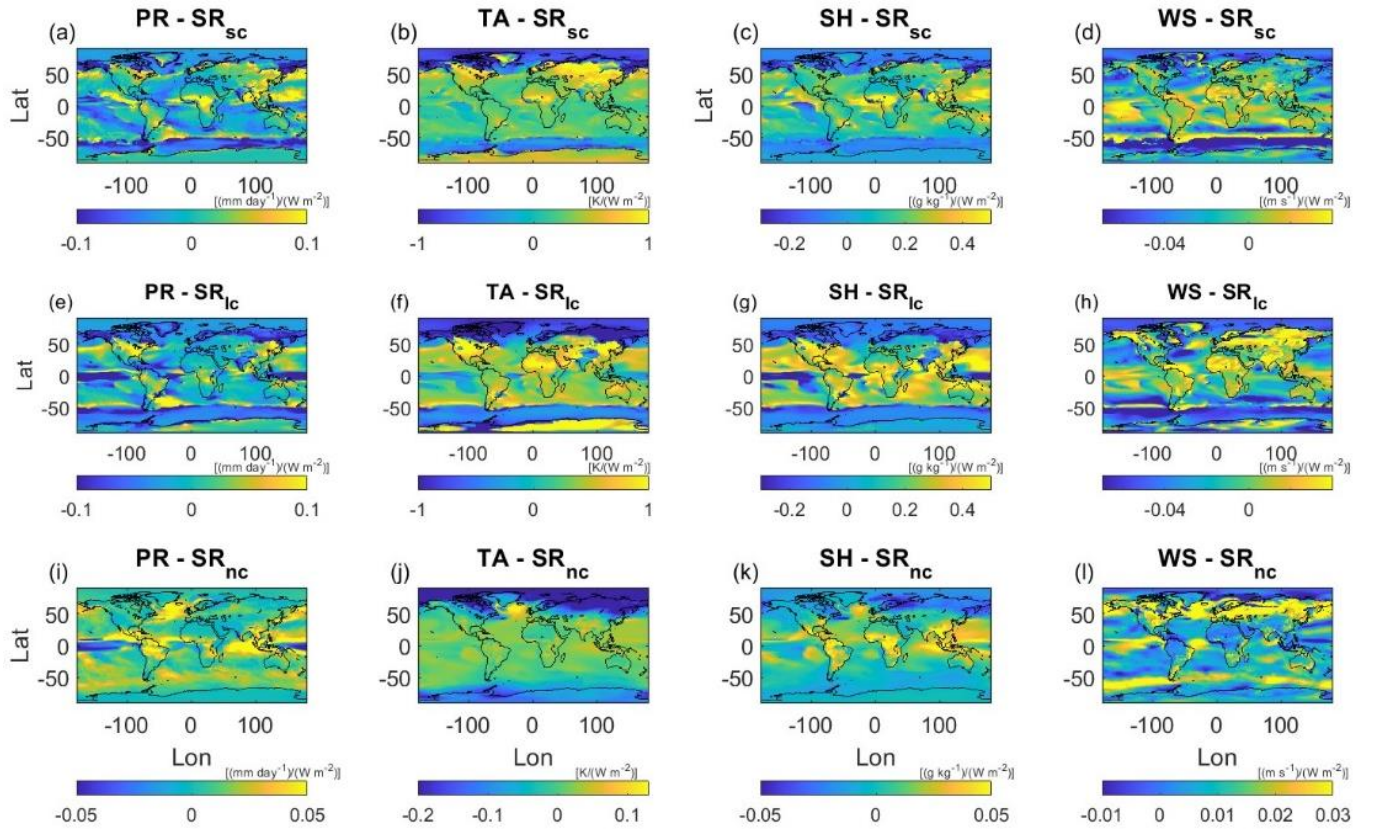

**Figure S3.** The global spatial pattern of climatic sensitivity to surface solar radiation for precipitation (a, e, i), near surface air temperature (b, f, j), near surface specific humidity (c, g, k), and near surface wind speed (d, h, l) computed for SR<sub>sc</sub> (a,b,c,d), SR<sub>lc</sub> (e,f,g,h) and the SR<sub>nc</sub> (i,j,k,l) scenario.

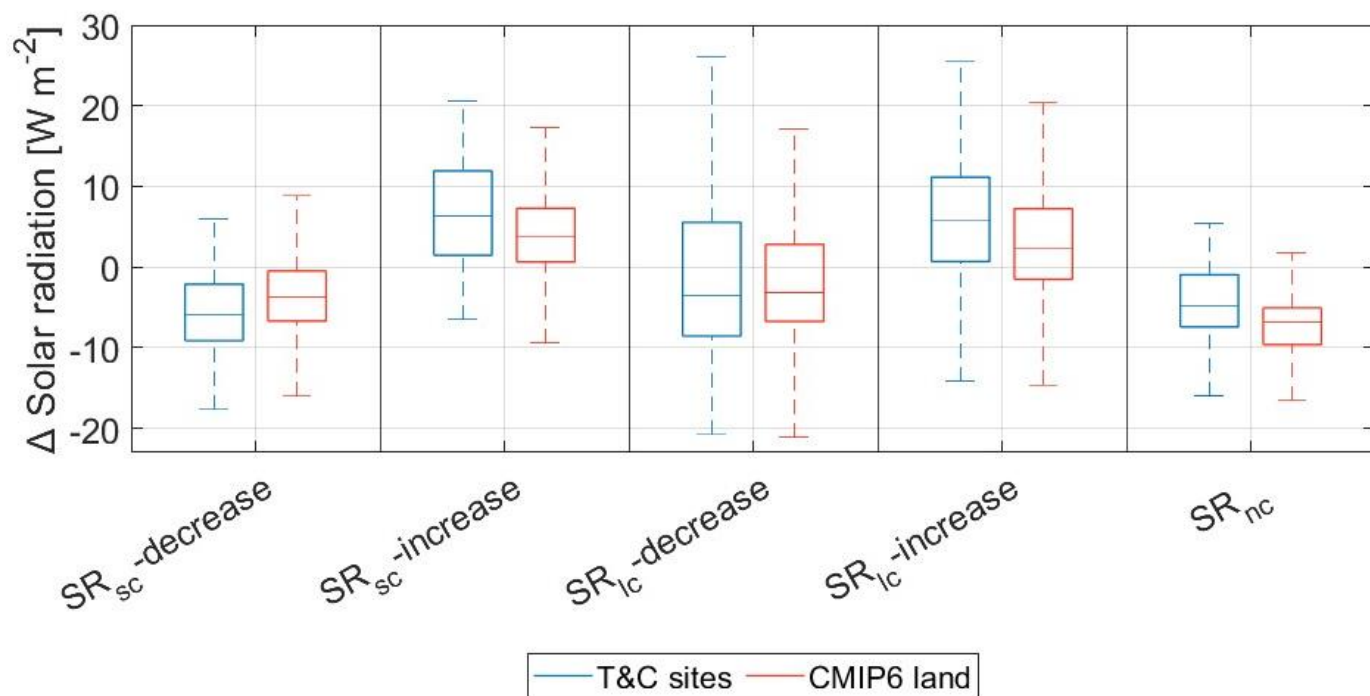

**Figure S4.** Boxplots of the distribution of changes in solar radiation for the 115 sites selected for T&C simulations (blue boxes) and CMIP6 simulations (red boxes) under the five different scenarios (no climate feedback, short and long-term climate feedback with increasing and decreasing shortwave radiation).

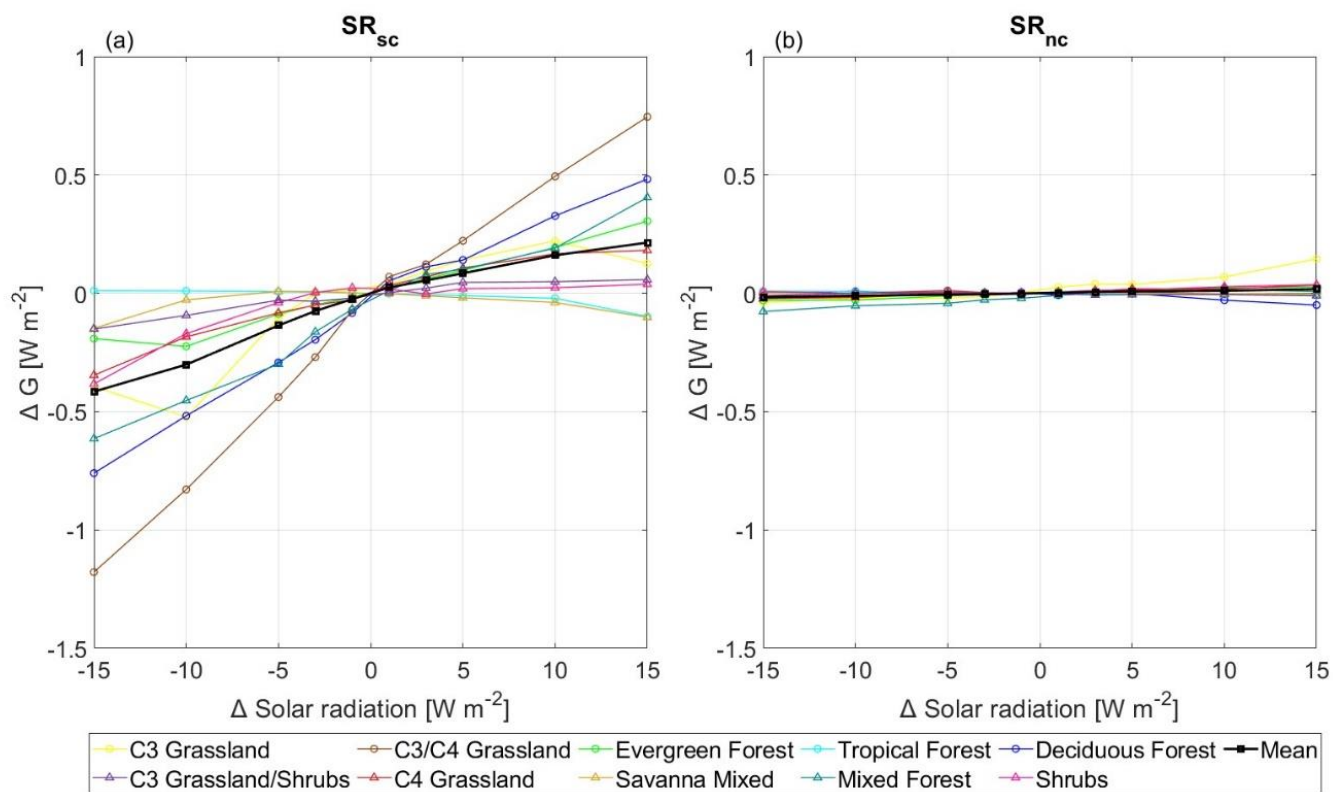

**Figure S5.** Changes in ground heat flux due to changes in surface solar radiation at the 115 sites simulated with T&C under the (a)  $\text{SR}_{\text{sc}}$  and (b)  $\text{SR}_{\text{nc}}$  scenarios. Colored lines indicate changes in ten different biomes, and thick black lines indicate the average.

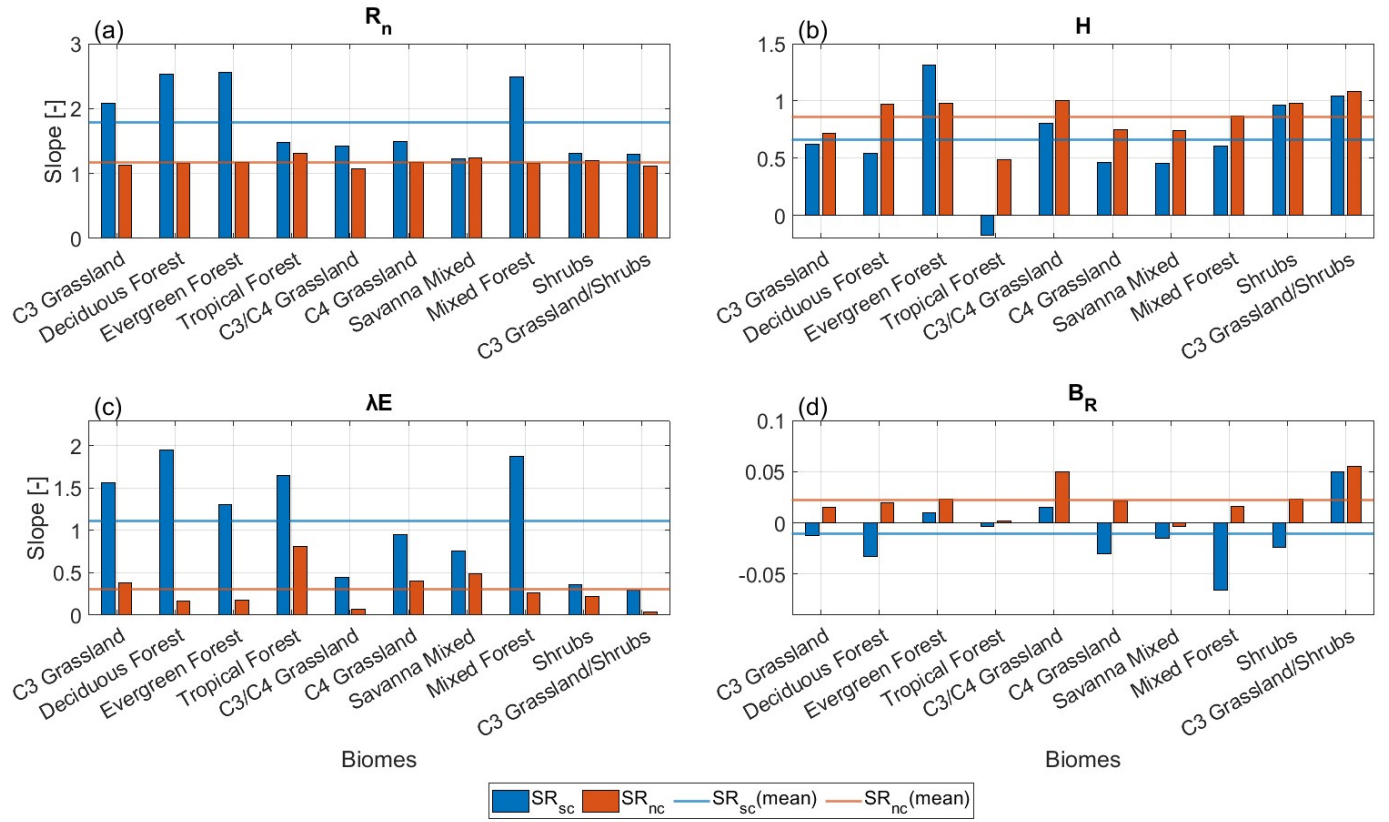

**Figure S6.** Sensitivities to solar radiation changes of (a) net radiation, (b) sensible heat, (c) latent heat and (d) Bowen ratio across the different biomes in the  $SR_{sc}$  and  $SR_{nc}$  scenarios. The reference line indicates the average level. These sensitivities are computed as the slopes of the linear regression between changes in a given variable and changes in short-wave solar radiation from  $-5 \text{ W m}^{-2}$  to  $5 \text{ W m}^{-2}$ .



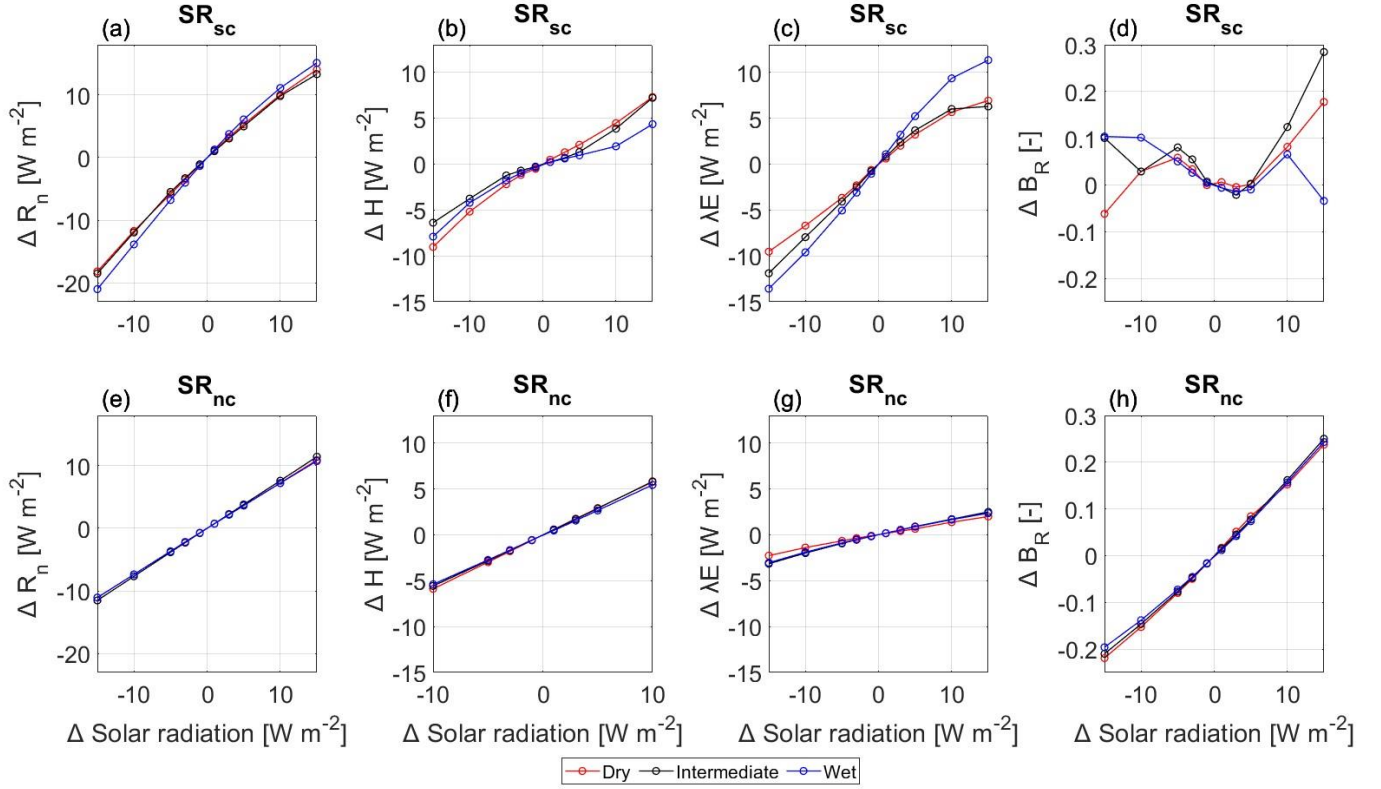

**Figure S7.** Changes in the energy fluxes (a) (e) net radiation, (b) (f) sensible heat, (c) (g) latent heat, and (d) (h) Bowen ratio due to changing surface solar radiation at the 115 sites simulated with T&C for the  $\text{SR}_{\text{sc}}$  and  $\text{SR}_{\text{nc}}$  scenarios. Colored lines indicate changes for dry, intermediate and wet conditions as expressed by the Wetness Index.

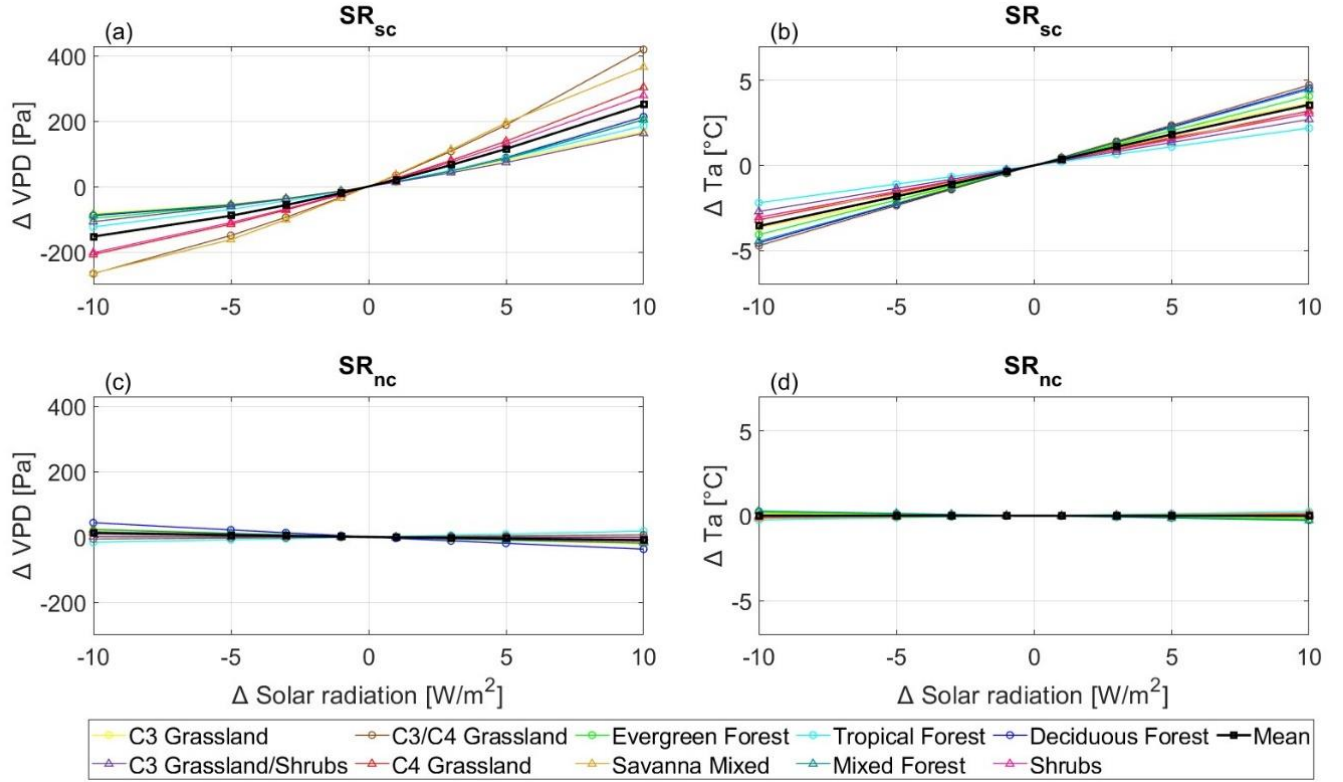

**Figure S8.** Changes in (a) (c) VPD and (b) (d) air temperature due to changes in surface solar radiation at the 115 sites simulated with T&C under the  $\text{SR}_{\text{sc}}$  and  $\text{SR}_{\text{nc}}$  scenarios. Colored lines indicate changes in ten different biomes, and thick black lines indicate averages.



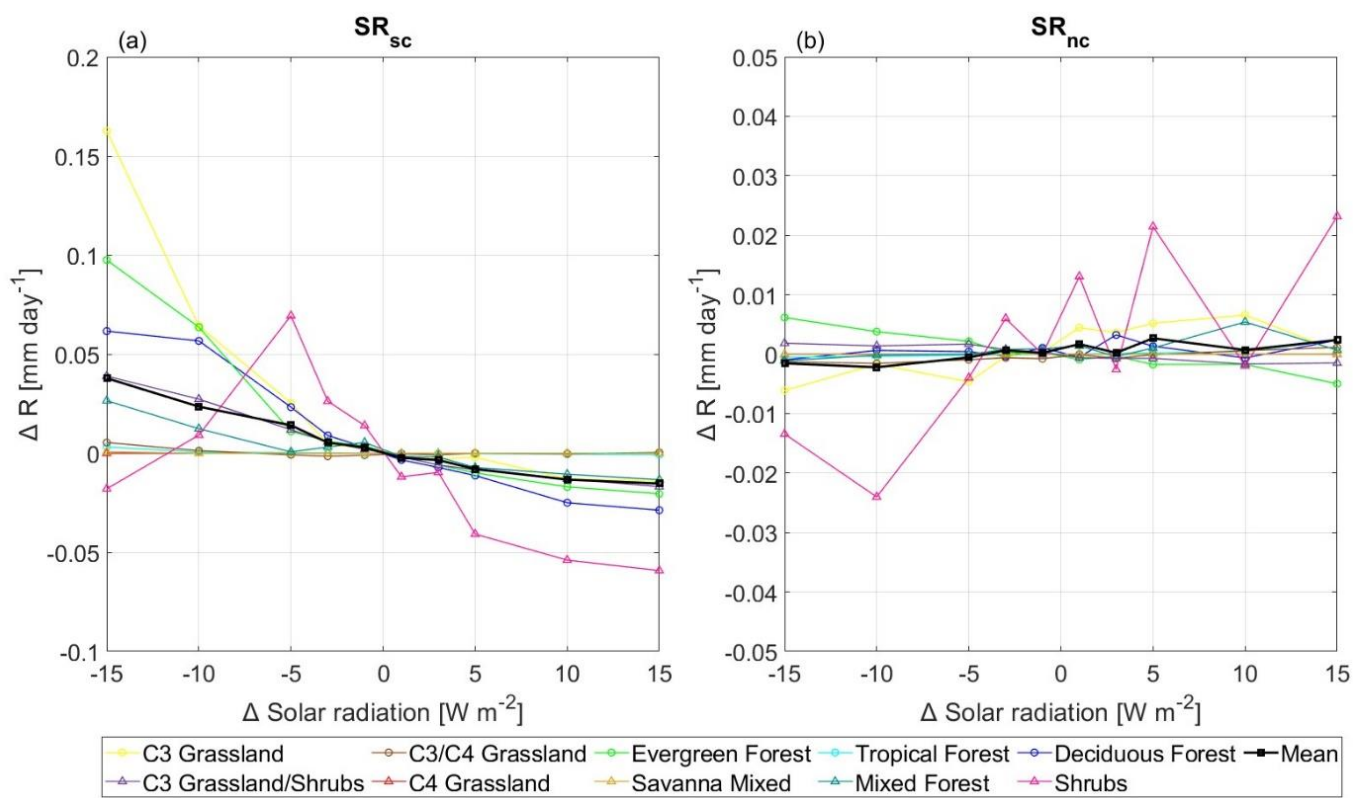

**Figure S9.** Changes in surface runoff due to changes in surface solar radiation at the 115 sites simulated with T&C under the (a)  $\text{SR}_{\text{sc}}$  and (b)  $\text{SR}_{\text{nc}}$  scenarios. Colored lines indicate changes in ten different biomes, and thick black lines indicate the average.

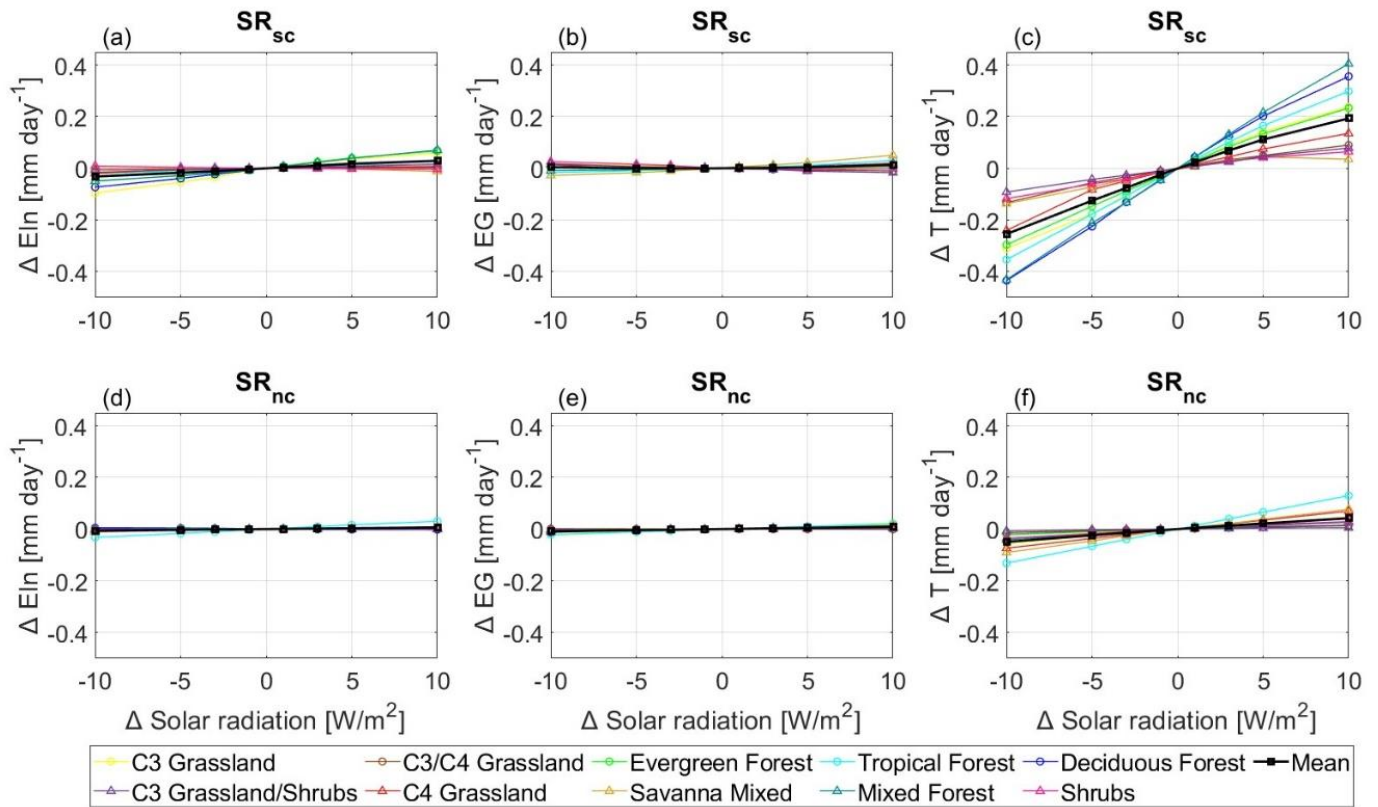

**Figure S10.** Changes in (a) (d) evaporation from interception, (b) ground evaporation, and (c) (f) transpiration driven by changes in surface solar radiation at the 115 sites simulated with T&C under the SR<sub>sc</sub> and SR<sub>nc</sub> scenarios. Colored lines indicate changes in ten different biomes, and thick black lines indicate the average.

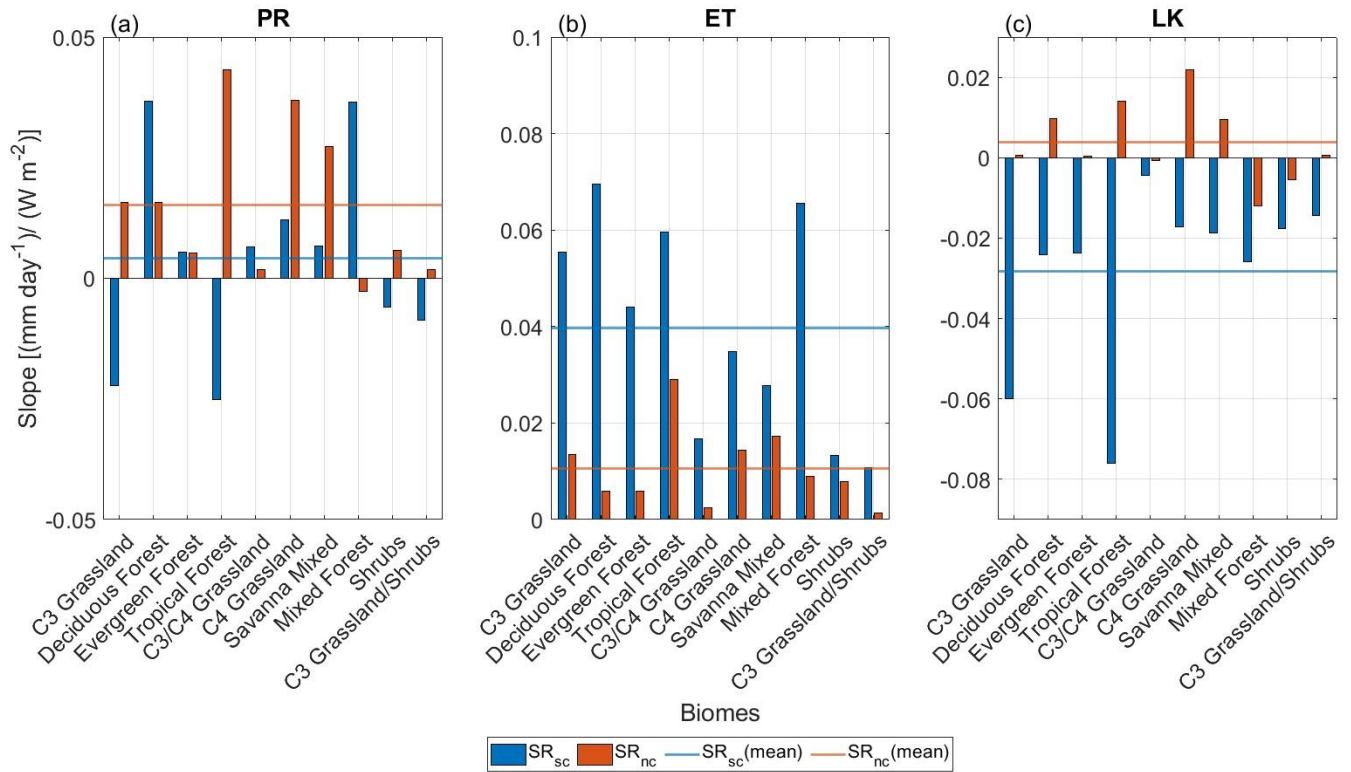

**Figure S11.** Sensitivity of (a) precipitation, (b) evapotranspiration, (c) and soil leakage to solar radiation changes spanning different biomes under the SR<sub>sc</sub> and SR<sub>nc</sub> scenarios. The reference line indicates the average across all sites. These sensitivities are computed as the slopes of the linear regression between changes in hydrological variables and changes in short-wave solar radiation from -5 W m<sup>-2</sup> to 5 W m<sup>-2</sup>.

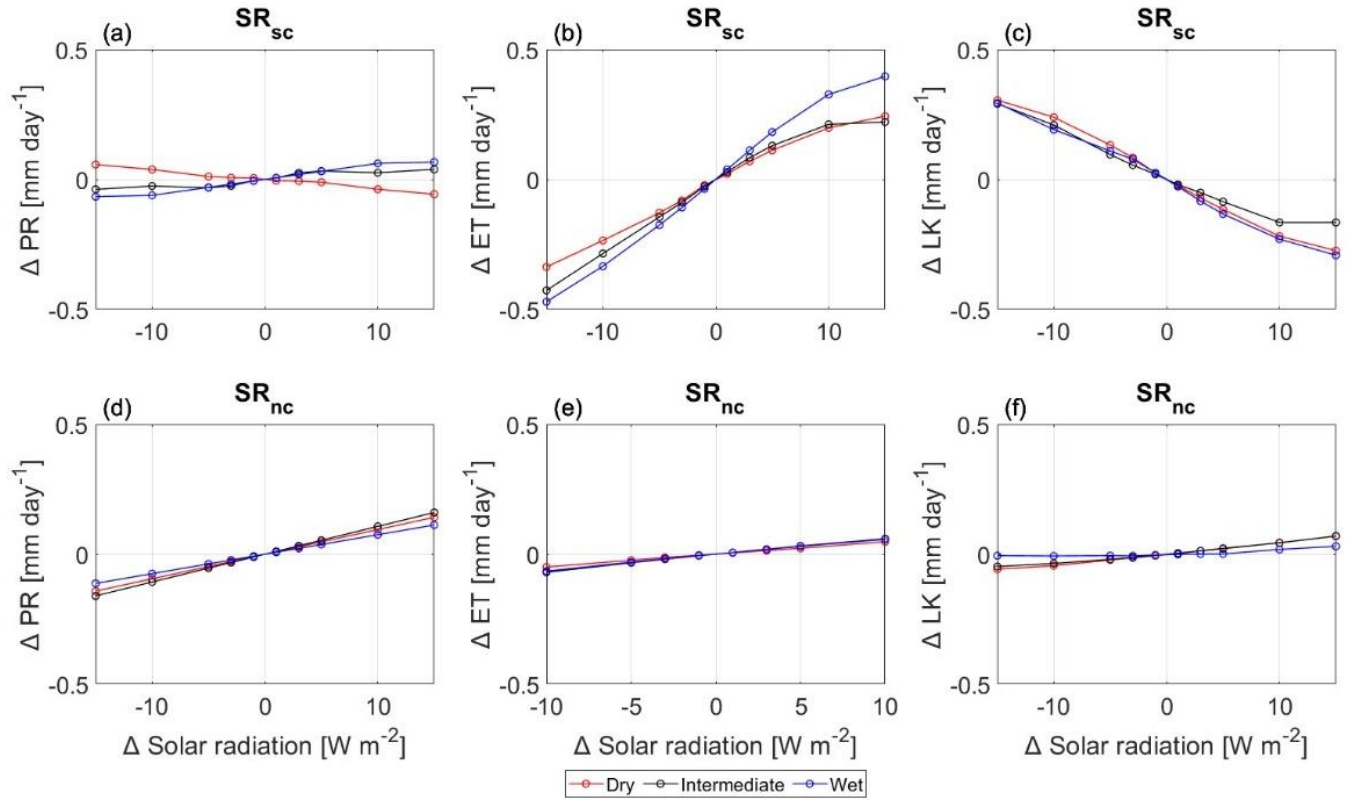

**Figure S12.** Changes in three hydrological variables (a) (d) precipitation, (b) (e) evapotranspiration, and (c) (f) soil leakage due to changes in surface solar radiation at the 115 sites simulated with T&C under the  $\text{SR}_{\text{sc}}$  and  $\text{SR}_{\text{nc}}$  scenarios. Colored lines indicate changes for dry, intermediate and wet conditions as expressed by the Wetness Index.

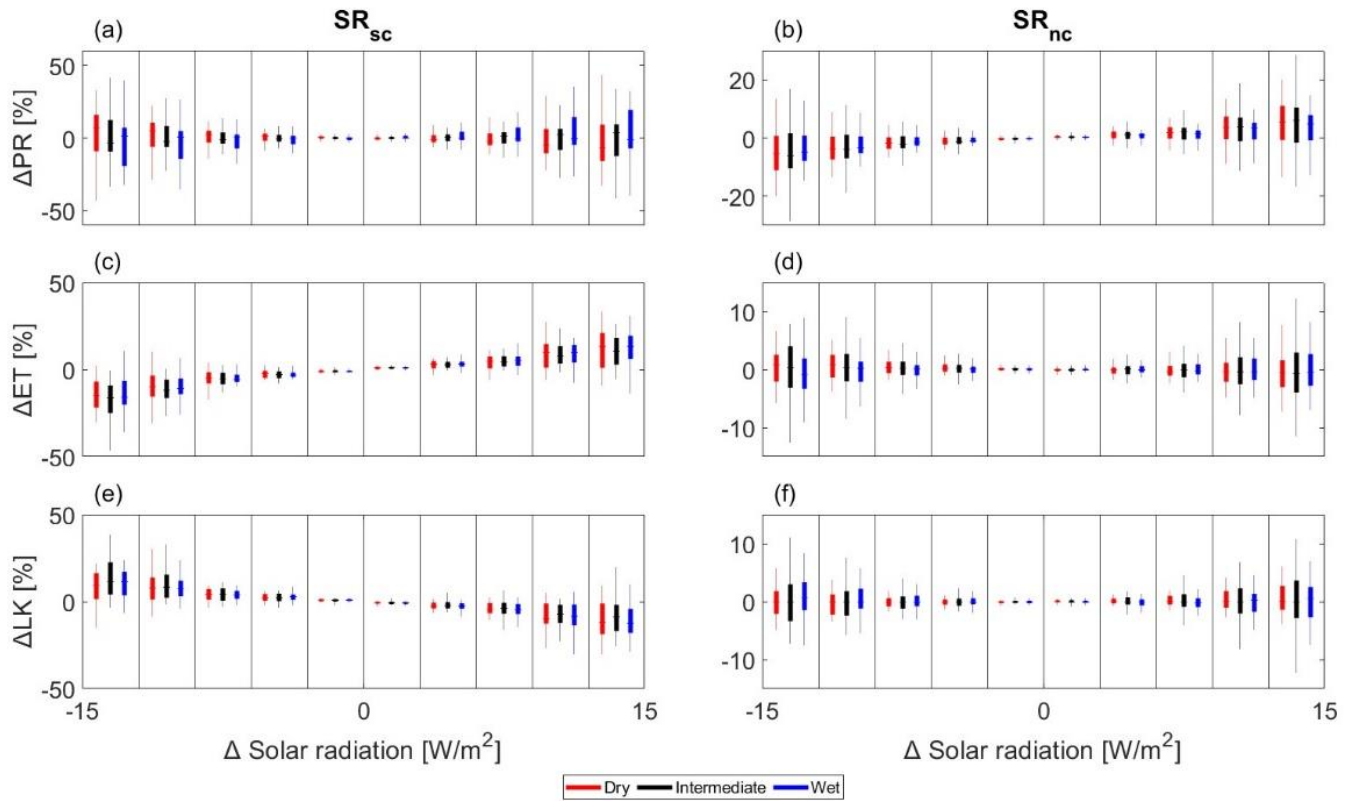

**Figure S13.** Distributions of relative changes in (a) (b) precipitation, (c) (d) evapotranspiration and (e) (f) leakage under the  $SR_{sc}$  and  $SR_{nc}$  scenarios, respectively. To avoid non-informative high values, due to extremely low baseline ET and LK, changes in ET and LK were rescaled based on their proportion of PR, for instance a 1% change in the plot is a 1% change on the ET/PR quantity.

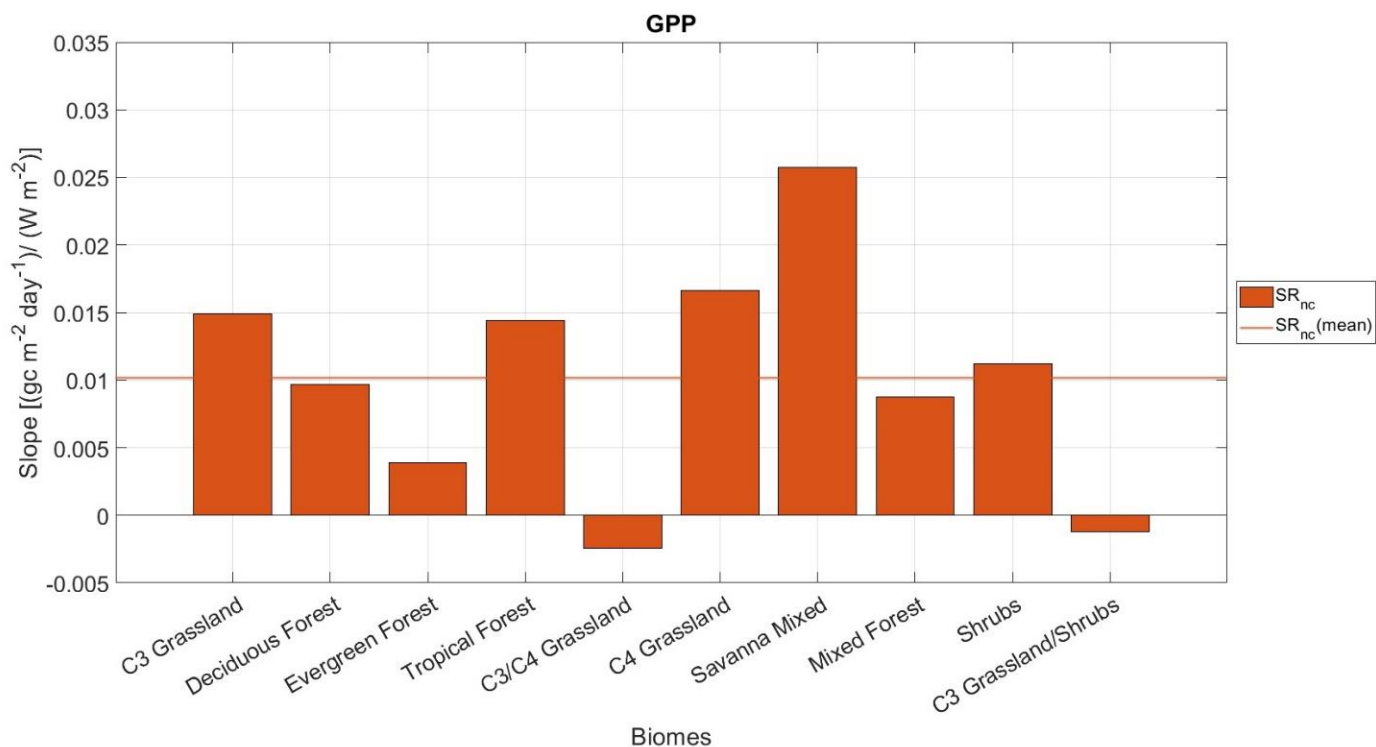

**Figure S14.** Sensitivity of GPP to solar radiation changes spanning different biomes under SR<sub>nc</sub> scenario. The reference line indicates the average level. These sensitivities are computed as the slopes of the linear regression between changes in GPP and changes in short-wave solar radiation from -5 W m<sup>-2</sup> to 5 W m<sup>-2</sup>.

| Model        | Reference                |
|--------------|--------------------------|
| IPSL-CM6A-LR | Boucher et al., 2020     |
| CESM2-WACCM  | Gettelman et al., 2019   |
| CNRM-ESM2-1  | Séférian et al., 2019    |
| MIROC-ES2H   | Kawamiya et al., 2020    |
| MRI-ESM2-0   | Yukimoto et al., 2019    |
| CESM2        | Danabasoglu et al., 2020 |

**Table S1.** The supporting references for the six GCM models used in this study.



**Table S2.** Statistics of the T&C simulation results for the 115 sites. See additional file TableS2.xlsx.

| Categories            | number of sites |
|-----------------------|-----------------|
| Evergreen Forest      | 29              |
| C3 Grassland          | 23              |
| Deciduous Forest      | 14              |
| Savanna Mixed         | 10              |
| Tropical Forest       | 8               |
| C3 / C4 Grassland     | 8               |
| C4 Grassland          | 7               |
| Shrubs                | 6               |
| Mixed Forest          | 5               |
| C3 Grassland / Shrubs | 5               |
| Dry                   | 31              |
| Intermediate          | 45              |
| Wet                   | 39              |

**Table S3.** Classification of 115 T&C sites and the number of locations it covers. The classification for wet/intermediate/dry locations is based on the wetness index: dry (wetness index  $< 0.5$ ), intermediate ( $0.5 < \text{wetness index} < 1$ ), wet (wetness index  $> 0.5$ ).

| Variables                                                               | Scenario         | C3<br>Grassland | Deciduous Forest<br>Grassland/Shrubs | Evergreen<br>Forest | Tropical<br>Forest | C3/C4<br>Grassland | C4<br>Grassland | Savanna<br>Mixed | Mixed<br>Forest | Shrubs | C3<br>Grassland/Shrubs | Mean          |
|-------------------------------------------------------------------------|------------------|-----------------|--------------------------------------|---------------------|--------------------|--------------------|-----------------|------------------|-----------------|--------|------------------------|---------------|
| Net radiation                                                           | SR <sub>sc</sub> | 2.079           | 2.525                                | 2.559               | 1.486              | 1.429              | 1.488           | 1.230            | 2.485           | 1.310  | 1.302                  | <b>1.789</b>  |
| [-]                                                                     | SR <sub>nc</sub> | 1.129           | 1.158                                | 1.170               | 1.315              | 1.070              | 1.177           | 1.244            | 1.153           | 1.200  | 1.120                  | <b>1.174</b>  |
| Sensible heat                                                           | SR <sub>sc</sub> | 0.625           | 0.545                                | 1.315               | -0.170             | 0.808              | 0.461           | 0.459            | 0.606           | 0.961  | 1.044                  | <b>0.665</b>  |
| [-]                                                                     | SR <sub>nc</sub> | 0.720           | 0.971                                | 0.980               | 0.489              | 1.000              | 0.749           | 0.745            | 0.871           | 0.977  | 1.079                  | <b>0.858</b>  |
| Latent heat                                                             | SR <sub>sc</sub> | 1.561           | 1.949                                | 1.303               | 1.655              | 0.442              | 0.953           | 0.761            | 1.877           | 0.361  | 0.296                  | <b>1.116</b>  |
| [-]                                                                     | SR <sub>nc</sub> | 0.386           | 0.172                                | 0.180               | 0.816              | 0.067              | 0.402           | 0.486            | 0.260           | 0.222  | 0.039                  | <b>0.303</b>  |
| Bowen ratio                                                             | SR <sub>sc</sub> | -0.012          | -0.033                               | 0.010               | -0.004             | 0.015              | -0.030          | -0.015           | -0.066          | -0.024 | 0.050                  | <b>-0.011</b> |
| [m <sup>2</sup> W <sup>-1</sup> ]                                       | SR <sub>nc</sub> | 0.015           | 0.019                                | 0.023               | 0.002              | 0.050              | 0.021           | -0.003           | 0.016           | 0.023  | 0.055                  | <b>0.022</b>  |
| Precipitation                                                           | SR <sub>sc</sub> | -0.022          | 0.037                                | 0.005               | -0.025             | 0.007              | 0.012           | 0.007            | 0.036           | -0.006 | -0.009                 | <b>0.004</b>  |
| [ mm day <sup>-1</sup> m <sup>2</sup> W <sup>-1</sup> ]                 | SR <sub>nc</sub> | 0.016           | 0.016                                | 0.005               | 0.043              | 0.002              | 0.037           | 0.027            | -0.003          | 0.006  | 0.002                  | <b>0.015</b>  |
| Evapotranspiration                                                      | SR <sub>sc</sub> | 0.056           | 0.070                                | 0.044               | 0.060              | 0.017              | 0.035           | 0.028            | 0.066           | 0.013  | 0.011                  | <b>0.040</b>  |
| [ mm day <sup>-1</sup> m <sup>2</sup> W <sup>-1</sup> ]                 | SR <sub>nc</sub> | 0.013           | 0.006                                | 0.006               | 0.029              | 0.002              | 0.014           | 0.017            | 0.009           | 0.008  | 0.001                  | <b>0.011</b>  |
| Leakage                                                                 | SR <sub>sc</sub> | -0.060          | -0.024                               | -0.024              | -0.076             | -0.004             | -0.017          | -0.019           | -0.026          | -0.018 | -0.014                 | <b>-0.028</b> |
| [ mm day <sup>-1</sup> m <sup>2</sup> W <sup>-1</sup> ]                 | SR <sub>nc</sub> | 0.001           | 0.010                                | 0.000               | 0.014              | -0.001             | 0.022           | 0.009            | -0.012          | -0.005 | 0.001                  | <b>0.004</b>  |
| GPP                                                                     | SR <sub>nc</sub> | 0.015           | 0.010                                | 0.004               | 0.014              | -0.002             | 0.017           | 0.026            | 0.009           | 0.011  | -0.001                 | <b>0.010</b>  |
| [ gc m <sup>-2</sup> day <sup>-1</sup> m <sup>2</sup> W <sup>-1</sup> ] |                  |                 |                                      |                     |                    |                    |                 |                  |                 |        |                        |               |

**Table S4.** Sensitivity of ecohydrological variables to changes in solar radiation across ten biomes. The bold texts indicate the average across all biomes. These sensitivities are computed as the slopes of the linear regression between changes in ecological variables and changes in short-wave solar radiation from -5 W m<sup>-2</sup> to 5 W m<sup>-2</sup>.

| Categories                           | $\Delta$ GPP [%] |                  |                  |                  |
|--------------------------------------|------------------|------------------|------------------|------------------|
| Scenarios                            | SR <sub>sc</sub> | SR <sub>nc</sub> | SR <sub>sc</sub> | SR <sub>nc</sub> |
| $\Delta R_{sw}$ [W m <sup>-2</sup> ] | -5               | -5               | +5               | +5               |
| Evergreen Forest                     | -7.7             | -0.6             | 4.3              | 0.2              |
| C3 Grassland                         | -15.0            | -1.7             | 8.6              | 1.5              |
| Deciduous Forest                     | -13.5            | -1.1             | 7.1              | 1.1              |
| Savanna Mixed                        | -2.6             | -4.1             | -4.7             | 2.1              |
| Tropical Forest                      | 0.6              | -1.5             | -3.2             | 1.5              |
| C3 / C4 Grassland                    | -4.7             | 0.2              | 0.2              | -0.2             |
| C4 Grassland                         | 0.6              | -1.9             | 1.9              | 1.7              |
| Shrubs                               | 0.1              | -1.1             | -1.1             | 1.3              |
| Mixed Forest                         | -19.3            | -1.3             | 14.8             | 0.6              |
| C3 Grassland / Shrubs                | -3.6             | 0.2              | 3.0              | -0.1             |
| Mean                                 | -6.5             | -1.3             | 3.1              | 1.0              |

**Table S5.** The mean percentage change in GPP across 10 biomes under the scenarios with 5 W m<sup>-2</sup> increased/decreased solar radiation.

| Variable           | Scenario         | Changes [%]                           |                                       |
|--------------------|------------------|---------------------------------------|---------------------------------------|
|                    |                  | $\Delta R_{sw} = -5 \text{ W m}^{-2}$ | $\Delta R_{sw} = +5 \text{ W m}^{-2}$ |
| Net radiation      | SR <sub>sc</sub> | -6.0                                  | 5.4                                   |
|                    | SR <sub>nc</sub> | -4.1                                  | 4.1                                   |
| Sensible heat      | SR <sub>sc</sub> | -3.6                                  | 3.0                                   |
|                    | SR <sub>nc</sub> | -6.2                                  | 6.2                                   |
| Latent heat        | SR <sub>sc</sub> | -8.4                                  | 8.0                                   |
|                    | SR <sub>nc</sub> | -2.0                                  | 1.9                                   |
| Bowen ratio        | SR <sub>sc</sub> | 5.0                                   | -1.0                                  |
|                    | SR <sub>nc</sub> | -8.0                                  | 8.0                                   |
| Precipitation      | SR <sub>sc</sub> | -0.8                                  | 0.8                                   |
|                    | SR <sub>nc</sub> | -1.9                                  | 1.9                                   |
| Evapotranspiration | SR <sub>sc</sub> | -8.4                                  | 8.0                                   |
|                    | SR <sub>nc</sub> | -2.0                                  | 1.9                                   |
| Leakage            | SR <sub>sc</sub> | 8.9                                   | -9.1                                  |
|                    | SR <sub>nc</sub> | -1.5                                  | 1.4                                   |
| GPP                | SR <sub>sc</sub> | -6.5                                  | 3.1                                   |
|                    | SR <sub>nc</sub> | -1.3                                  | 1.0                                   |

**Table S6.** The mean percentage change in ecohydrological variables under the scenarios with  $5 \text{ W m}^{-2}$  increased/decreased solar radiation averaged across all biomes.

## Reference

- Boucher, O., Servonnat, J., Albright, A. L., Aumont, O., Balkanski, Y., Bastrikov, V., Bekki, S., Bonnet, R., Bony, S., Bopp, L., Braconnot, P., Brockmann, P., Cadule, P., Caubel, A., Cheruy, F., Codron, F., Cozic, A., Cugnet, D., D'Andrea, F., ... Vuichard, N.: Presentation and Evaluation of the IPSL-CM6A-LR Climate Model. *Journal of Advances in Modeling Earth Systems*, 12(7), e2019MS002010. <https://doi.org/10.1029/2019MS002010>, 2020.
- Danabasoglu, G., Lamarque, J. -F., Bacmeister, J., Bailey, D. A., DuVivier, A. K., Edwards, J., Emmons, L. K., Fasullo, J., Garcia, R., Gettelman, A., Hannay, C., Holland, M. M., Large, W. G., Lauritzen, P. H., Lawrence, D. M., Lenaerts, J. T. M., Lindsay, K., Lipscomb, W. H., Mills, M. J., ... Strand, W. G.: The Community Earth System Model Version 2 (CESM2). *Journal of Advances in Modeling Earth Systems*, 12(2), e2019MS001916. <https://doi.org/10.1029/2019MS001916>, 2020.
- Gettelman, A., Mills, M. J., Kinnison, D. E., Garcia, R. R., Smith, A. K., Marsh, D. R., Tilmes, S., Vitt, F., Bardeen, C. G., McInerney, J., Liu, H. -L., Solomon, S. C., Polvani, L. M., Emmons, L. K., Lamarque, J. -F., Richter, J. H., Glanville, A. S., Bacmeister, J. T., Phillips, A. S., ... Randel, W. J.: The Whole Atmosphere Community Climate Model Version 6 (WACCM6). *Journal of Geophysical Research: Atmospheres*, 124(23), 12380–12403. <https://doi.org/10.1029/2019JD030943>, 2019.
- Kawamiya, M., Hajima, T., Tachiiri, K., Watanabe, S., & Yokohata, T.: Two decades of Earth system modeling with an emphasis on Model for Interdisciplinary Research on Climate (MIROC). *Progress in Earth and Planetary Science*, 7(1), 64. <https://doi.org/10.1186/s40645-020-00369-5>, 2020.
- Séférian, R., Nabat, P., Michou, M., Saint-Martin, D., Voldoire, A., Colin, J., Decharme, B., Delire, C., Berthet, S., Chevallier, M., Sénési, S., Franchisteguy, L., Vial, J., Mallet, M., Joetzjer, E., Geoffroy, O., Guérémy, J., Moine, M., Msadek, R., ... Madec, G.: Evaluation of CNRM Earth System Model, CNRM-ESM2-1: Role of Earth System Processes in Present-Day and Future Climate. *Journal of Advances in Modeling Earth Systems*, 11(12), 4182–4227. <https://doi.org/10.1029/2019MS001791>, 2019.
- Yukimoto, S., Kawai, H., Koshiro, T., Oshima, N., Yoshida, K., Urakawa, S., Tsujino, H., Deushi, M., Tanaka, T., Hosaka, M., Yabu, S., Yoshimura, H., Shindo, E., Mizuta, R., Obata, A., Adachi, Y., & Ishii, M.: The Meteorological Research Institute Earth System Model Version 2.0, MRI-ESM2.0: Description and Basic Evaluation of the Physical Component. *Journal of the Meteorological Society of Japan. Ser. II*, 97(5), 931–965. <https://doi.org/10.2151/jmsj.2019-051>, 2019.
